# Supplementary material for: Linking Cr3 triangles through phosphonates and lanthanides: synthetic, structural, magnetic and EPR studies
Source: Royal Society of Chemistry journal article supplement (doi:10.1039/c4dt01264j), 2014-01-01
Supplement: c4dt01264j1.pdf [file c4dt01264j1.pdf]

## Linking $\text{Cr}_3$ triangles through phosphonates and lanthanides: synthetic, structural, magnetic and EPR studies

Karzan H. Zangana, Eufemio Moreno Pineda, Iñigo J. Vitorica-Yrezabal, Eric J. L. McInnes and Richard E. P. Winpenny\*

*School of Chemistry and Photon Science Institute, The University of Manchester, Oxford Road, Manchester M13 9PL, UK.*

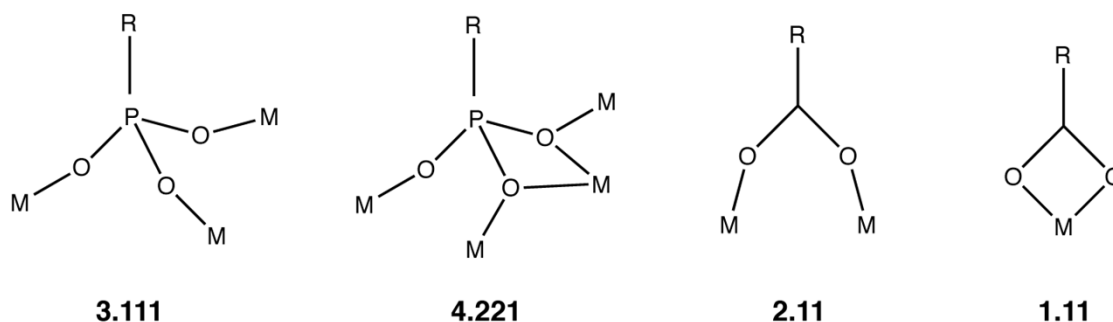

**Figure S1.** Scheme for binding modes by Harris notation of the phosphonates and carboxylates.

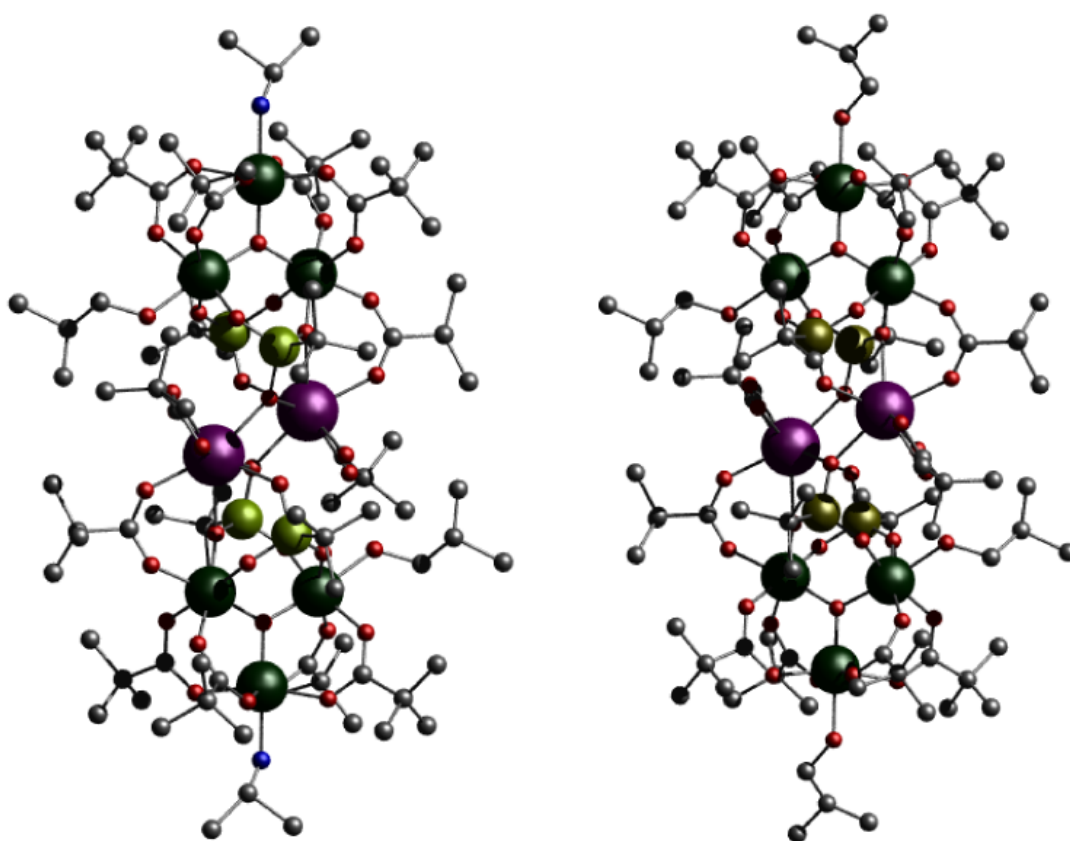

**Figure S2.** Crystal structure of cluster 2 showing  $t\text{BuOH}$  terminals (right); Crystal structure of clusters 1, 3, 4 and 5 showing amine terminals (left). Scheme: La, purple; Cr, dark green; P, light green; O, red; C, grey; N, cyan; H omitted for clarity.

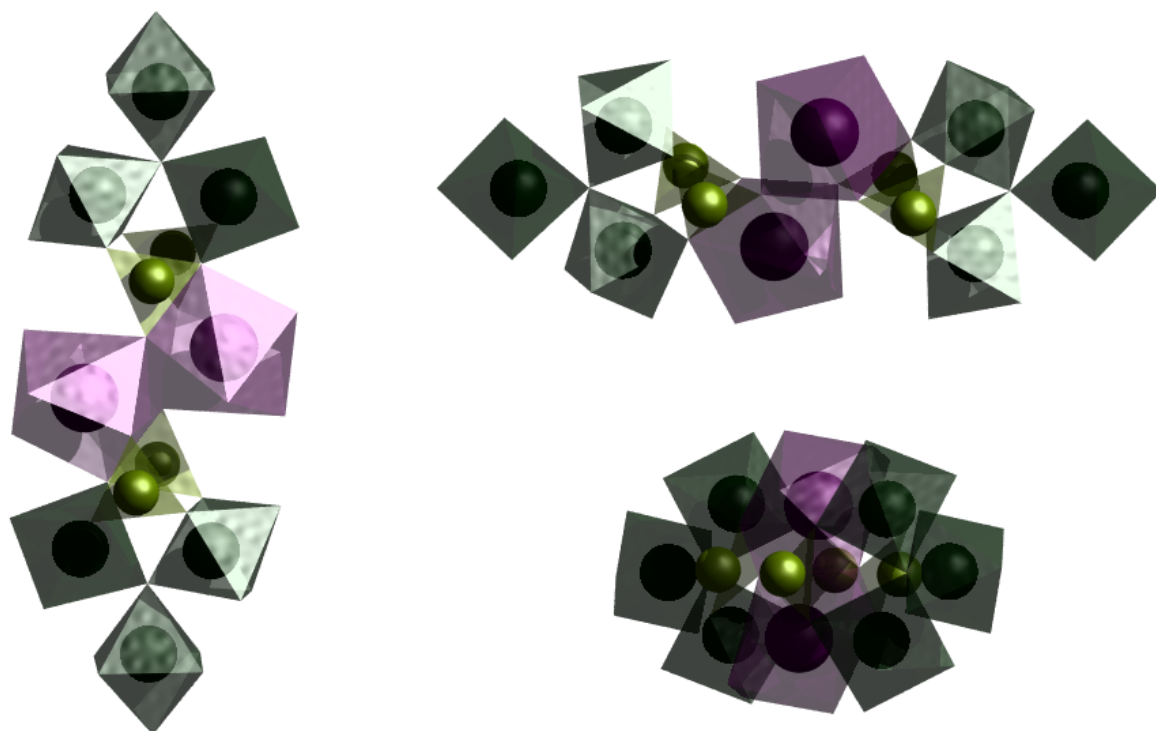

**Figure S3.** Polyhedral view of  $\{\text{Cr}_6\text{Ln}_2\text{P}_4\}$  core.

**Table S1.** Selected bond distances and angles of **1–5**.

|                                              | <b>1</b> | <b>2</b> | <b>3</b> | <b>4</b> | <b>5</b> |
|----------------------------------------------|----------|----------|----------|----------|----------|
| $\text{Cr}_1 \dots \text{Cr}_2 / \text{\AA}$ | 3.263(1) | 3.258(3) | 3.271(2) | 3.273(2) | 3.281(1) |
| $\text{Cr}_2 \dots \text{Cr}_3 / \text{\AA}$ | 3.427(1) | 3.422(2) | 3.425(1) | 3.426(2) | 3.424(1) |
| $\text{Cr}_1 \dots \text{Cr}_3 / \text{\AA}$ | 3.263(2) | 3.268(3) | 3.287(1) | 3.235(1) | 3.271(1) |
| $\text{O}_1 - \text{Ln}_1 / \text{\AA}$      | 6.560(4) | 6.503(8) | 6.492(4) | 6.459(4) | 6.470(4) |

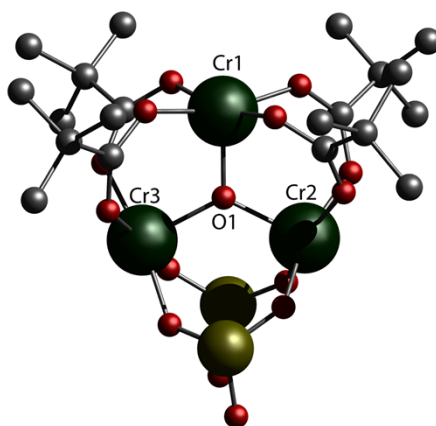

**Figure S4.**  $\{\text{Cr}_3\}$  moiety for  $\text{Cr}_6\text{Ln}_2\text{P}_4$  clusters. Scheme: La, purple; Cr, dark green; P, light green; O, red; C, grey; N, cyan; H omitted for clarity.
